# Supplementary material
Source: PubMed Central journal article supplement (PMC6196715)
Supplement: NIHMS991407-supplement-Suppl__Infor_.pdf [file NIHMS991407-supplement-Suppl__Infor_.pdf]

**Supplementary Table 1 | X-ray and cryo-EM data collection and refinement statistics.**

**a**

| <b>CTB1 SAT-KS-MAT</b>                |                      |
|---------------------------------------|----------------------|
| <b>Data collection</b>                |                      |
| Space group                           | C222 <sub>1</sub>    |
| Cell dimensions                       |                      |
| a, b, c (Å)                           | 108.05, 230.2, 253.8 |
| $\alpha$ , $\beta$ , $\gamma$ (°)     | 90.0, 90.0, 90.0     |
| Resolution (Å)                        | 126.9 – 2.77         |
| R <sub>merge</sub> (%)*               | 21.2 (193.8)         |
| I/ $\sigma$ I*                        | 10.13 (1.03)         |
| CC <sub>1/2</sub> *                   | 99.5 (43.3)          |
| Completeness (%)*                     | 99.2 (91.9)          |
| Redundancy*                           | 8.5 (5.6)            |
| <b>Refinement</b>                     |                      |
| Resolution (Å)                        | 63.45 – 2.77         |
| R <sub>work</sub> / R <sub>free</sub> | 0.21 / 0.24          |
| No. atoms                             | 39,201               |
| Protein                               | 38,682               |
| Ligand/ion                            | 167                  |
| Water                                 | 352                  |
| B-factors                             | 70.17                |
| Protein (Å <sup>2</sup> )             | 70.31                |
| Ligand/ion (Å <sup>2</sup> )          | 84.20                |
| Water (Å <sup>2</sup> )               | 48.78                |
| R.m.s deviations                      |                      |
| Bond lengths (Å)                      | 0.002                |
| Bond angles (°)                       | 0.496                |

**b**

| <b>CTB1 SAT°-KS-MAT°=ACP2</b>                           |           |
|---------------------------------------------------------|-----------|
| <b>Data collection and processing</b>                   |           |
| Nominal magnification                                   | 105,000x  |
| Voltage (keV)                                           | 300       |
| Electron exposure (e- Å <sup>-2</sup> ) initial / final | 90 / 41   |
| Defocus range(μm)                                       | 0.8-4.5   |
| Pixel size (Å)                                          | 1.326     |
| Symmetry imposed                                        | C1        |
| Movies                                                  | 1,728     |
| Frames per movie                                        | 60        |
| Initial particles images                                | 122,089   |
| Final particle images                                   | 25,107    |
| <b>Refinements</b>                                      |           |
| Initial model used                                      | ab initio |
| Model resolution (Å)                                    | 7.1       |
| FSC threshold                                           | 0.143     |
| Model resolution range(Å)                               | 4-10      |
| Map sharpening B-factor (Å <sup>2</sup> )               | -350      |
| Model composition                                       |           |
| Non-hydrogen atoms                                      | 19,628    |
| Protein residues                                        | 2,591     |
| Ligands                                                 | 0         |
| R.m.s deviations                                        |           |
| Bond lengths (Å)                                        | 0.010     |
| Bond angles (°)                                         | 1.290     |
| Validation                                              |           |
| MolProbity score                                        | 1.57      |
| All-atom clashscore                                     | 6.09      |
| Rotamer outliers (%)                                    | 0.00      |
| Ramachandran plot                                       |           |
| Favored (%)                                             | 96.47     |
| Allowed (%)                                             | 3.41      |
| Disallowed (%)                                          | 0.12      |

**(a)** Crystallographic data collection and refinement statistics. The resolution cutoff was determined by CC<sub>1/2</sub> criterion (Karplus, P. A. & Diederichs, K. Science 336, 1030-1033 (2012)). \*, Highest resolution shell is shown in parentheses. **(b)** Cryo-electron microscopic data collection and refinement statistics.

**Supplementary Table 2 | Structural comparison and interface analysis of CTB1 SAT-KS-MAT.**

**a**

| <b>Structure 1</b>                       | <b>Structure 2</b>                              | <b>C<sub>α</sub> r.m.s.d. [Å]</b> | <b>Aligned residues</b> |     |
|------------------------------------------|-------------------------------------------------|-----------------------------------|-------------------------|-----|
| CTB1 SAT                                 | CTB1 SAT (2 <sup>nd</sup> chain)                | 0.34                              | 350                     |     |
|                                          | Closest* in PDB (3G87) no multienzyme           | 2.56                              | 262                     |     |
|                                          | human FAS MAT (3HHD)                            | 2.59                              | 249                     |     |
|                                          | CazM SAT (4RPM) loading domain                  | 2.63                              | 272                     |     |
|                                          | PksE AT (5DZ7) <sup>†</sup>                     | 2.64                              | 245                     |     |
|                                          | procine FAS MAT (2VZ9)                          | 2.65                              | 244                     |     |
|                                          | PKS13 AT (3TZX)                                 | 2.75                              | 249                     |     |
|                                          | PksC AT (5DZ6) <sup>†</sup>                     | 2.78                              | 251                     |     |
|                                          | CTB1 MAT                                        | 2.81                              | 255                     |     |
|                                          | DEBS AT <sub>5</sub> (2HG4)                     | 2.81                              | 254                     |     |
|                                          | Curl AT (4MZ0)                                  | 2.83                              | 251                     |     |
|                                          | DEBS AT <sub>3</sub> , (2QO3)                   | 2.86                              | 261                     |     |
|                                          | DisD AT (3RGI) <sup>†</sup>                     | 2.87                              | 258                     |     |
|                                          | VinK (5CZD)                                     | 2.87                              | 242                     |     |
|                                          | AVES1 AT (4RL1) loading domain                  | 2.89                              | 256                     |     |
|                                          | ZmaA (4QBU)                                     | 3.01                              | 244                     |     |
|                                          | DYNE8 AT (4AMP)                                 | 3.05                              | 217                     |     |
|                                          | MAS-like AT (5BP1)                              | 3.18                              | 259                     |     |
|                                          | OzmQ partial AT (4OQJ)                          | 3.22                              | 92                      |     |
|                                          | CTB1 KS                                         | CTB1 KS (2 <sup>nd</sup> chain)   | 0.23                    | 435 |
| PksL KS (5ENY)                           |                                                 | 1.40                              | 392                     |     |
| C0ZGQ5 KS (4Z37)                         |                                                 | 1.40                              | 398                     |     |
| Curl KS (4MZ0)                           |                                                 | 1.41                              | 400                     |     |
| MgsF KS (4TKT) <sup>†</sup>              |                                                 | 1.41                              | 401                     |     |
| PksJ KS (4NA3) <sup>†</sup>              |                                                 | 1.42                              | 404                     |     |
| human FAS KS (3HHD)                      |                                                 | 1.44                              | 389                     |     |
| procine FAS KS (2VZ9)                    |                                                 | 1.48                              | 388                     |     |
| DEBS KS <sub>3</sub> , (2QO3)            |                                                 | 1.49                              | 406                     |     |
| DEBS KS <sub>5</sub> (2HG4)              |                                                 | 1.49                              | 392                     |     |
| MgsE KS (4QYR) <sup>†</sup>              |                                                 | 1.52                              | 400                     |     |
| OzmH KS0 (4OPF) <sup>†</sup>             |                                                 | 1.52                              | 339                     |     |
| MAS-like KS (5BP1)                       |                                                 | 1.55                              | 347                     |     |
| OzmN KS (4WKY) <sup>†</sup>              |                                                 | 1.60                              | 374                     |     |
| RhiE KS (4KC5) <sup>†</sup>              |                                                 | 1.61                              | 399                     |     |
| Closest* - FabF KS (4JB6) no multienzyme |                                                 | 1.64                              | 378                     |     |
| OzmQ (4OQJ) <sup>†</sup>                 |                                                 | 1.75                              | 375                     |     |
| CTB1 MAT                                 |                                                 | CTB1 MAT (2 <sup>nd</sup> chain)  | 0.23                    | 304 |
|                                          |                                                 | Curl AT (4MZ0)                    | 1.72                    | 281 |
|                                          |                                                 | MAS-like AT (5BP1)                | 1.82                    | 285 |
|                                          | PKS13 AT (3TZY)                                 | 1.83                              | 290                     |     |
|                                          | human FAS MAT (3HHD)                            | 1.83                              | 280                     |     |
|                                          | procine FAS MAT (2VZ9)                          | 1.85                              | 279                     |     |
|                                          | DYNE8 AT (4AMP)                                 | 1.86                              | 231                     |     |
|                                          | DEBS AT <sub>3</sub> , (2QO3)                   | 1.87                              | 285                     |     |
|                                          | DEBS AT <sub>5</sub> (2HG4)                     | 1.89                              | 290                     |     |
|                                          | Closest* in PDB: AVES1 AT (4RL1) loading domain | 1.92                              | 284                     |     |
|                                          | ZmaA (4QBU)                                     | 2.00                              | 275                     |     |
|                                          | DisD AT (3RGI) <sup>†</sup>                     | 2.02                              | 269                     |     |
|                                          | PksC AT (5DZ6) <sup>†</sup>                     | 2.06                              | 266                     |     |
|                                          | PksE AT (5DZ7) <sup>†</sup>                     | 2.09                              | 264                     |     |
|                                          | VinK (5CZD)                                     | 2.26                              | 261                     |     |
|                                          | OzmQ partial AT (4OQJ)                          | 2.50                              | 89                      |     |
|                                          | CazM SAT (4RPM) loading domain                  | 2.68                              | 252                     |     |

**b**

| Interface 1      | Interface 2                     | Min area [Å <sup>2</sup> ] | Max area [Å <sup>2</sup> ] | Hydrogen bonds | Salt bridges |
|------------------|---------------------------------|----------------------------|----------------------------|----------------|--------------|
| SAT              | KS-LD-MAT-post MAT linker       | 1197.2                     | 1230.1                     | 6-8            | 3            |
| SAT <sup>§</sup> | KS <sup>§</sup>                 | 183.8                      | 184.9                      | 1-2            | 0            |
| SAT <sup>§</sup> | MAT <sup>§</sup>                | 946.1                      | 966.8                      | 5-6            | 2-3          |
| SAT              | SAT                             | 323.7                      | 323.7                      | 0              | 0            |
| SAT dimer        | KS dimer                        | 659.9                      | 659.9                      | 3              | 0            |
| SAT dimer        | KS-LD-MAT-post MAT linker dimer | 2718.5                     | 2718.5                     | 14             | 7            |
| SAT <sup>§</sup> | SAT-KS linker <sup>§</sup>      | 486.7                      | 500.1                      | 1-2            | 0            |
| KS               | KS                              | 2607.1                     | 2607.1                     | 10             | 1            |
| KS               | LD                              | 415.9                      | 416.5                      | 4              | 2            |
| KS               | post-MAT linker                 | 1460.0                     | 1465.8                     | 12-13          | 3-4          |
| LD               | post-MAT linker                 | 1262.5                     | 1277.4                     | 8              | 0-1          |
| MAT              | post-MAT linker                 | 908.5                      | 911.5                      | 4              | 1            |

**(a)** C<sub>α</sub> r.m.s. deviations obtained for structural comparison of crystallized CTB1 domains with their closest structural neighbors in the PDB and of multienzyme PKSs and FASs (to the best of our knowledge). For structures with several protomers only the best matches are reported. \*, Q-score based, †, *trans*-AT PKS. **(b)** Interfaces in the crystal structures of CTB1 SAT-KS-MAT. §Interface with the second protomer.

**Supplementary Table 3 | Plasmids used in this study**

| Plasmid                 | Protein                               | Vector  | Tag                | MW (g/mol) | $\epsilon$ ( $M^{-1}cm^{-1}$ ) |
|-------------------------|---------------------------------------|---------|--------------------|------------|--------------------------------|
| pECTB1-NKA6             | SAT-KS-MAT                            | pET-24a | C-His <sub>6</sub> | 140150     | 138200                         |
| pECTB1-SKM-C119A-S1010A | SAT <sup>o</sup> -KS-MAT <sup>o</sup> | pET-24a | C-His <sub>6</sub> | 140150     | 138200                         |
| p28CTB1-ACP1            | ACP1                                  | pET-28a | N-His <sub>6</sub> | 11160      | N/A                            |
| p28CTB1-ACP2            | ACP2                                  | pET-28a | N-His <sub>6</sub> | 11970      | 5500                           |
| pECTB1-SKM-R461A        | SAT-KS-MAT-R461A                      | pET-24a | C-His <sub>6</sub> | 140150     | 138200                         |
| pECTB1-SKM-R461E        | SAT-KS-MAT-R461E                      | pET-24a | C-His <sub>6</sub> | 140150     | 138200                         |
| pECTB1-SKM-R658A        | SAT-KS-MAT-R658A                      | pET-24a | C-His <sub>6</sub> | 140150     | 138200                         |
| pECTB1-SKM-R658E        | SAT-KS-MAT-R658E                      | pET-24a | C-His <sub>6</sub> | 140150     | 138200                         |
| pECTB1-SKM-R879A        | SAT-KS-MAT-R879A                      | pET-24a | C-His <sub>6</sub> | 140150     | 138200                         |
| pECTB1-SKM-R879E        | SAT-KS-MAT-R879E                      | pET-24a | C-His <sub>6</sub> | 140150     | 138200                         |
| pECTB1-PT               | PT                                    | pET-24a | C-His <sub>6</sub> | 41240      | 26150                          |
| pECTB1-TE               | TE                                    | pET-28a | N-His <sub>6</sub> | 33630      | 38055                          |

**Supplementary Table 4 | Primers used in this study.**

| Primer           | Sequence 5'-3'                       |
|------------------|--------------------------------------|
| CTB1-ACP1-5-A    | ATTACATATGGCAACCCAAGTGACTCCGCAA      |
| CTB1-ACP2-3-C    | ATTAGCGGCCGCGATCTCGTTAGGGGATGGATCAGT |
| CTB1-ACP2-5      | ATTACATATGGATCCATCCCCTAACGAGAT       |
| CTB1-ACP2-stop-3 | TAATGCGGCCGCCTATTCGTTGACCCAGAGAACC   |
| T7               | TAATACGACTCACTATAGGG                 |
| T7-term          | GCTAGTTATTGCTCAGCGG                  |
| CTB1-C119A-5     | TGCATTACCGGCGTTGCAACCGGCGCA          |
| CTB1-C119A-3     | CGTCAATGCGCCGGTTGCAACGCCGGT          |
| CTB1-S1010A-5    | GGTAGTTGGCCACGCGTTGGGCGAGTATGC       |
| CTB1-S1010A-3    | GCATACTCGCCCAACGCGTGGCCAACTACC       |
| CTB1-R461A-5     | ACATGAGTCCGGCGGAAGCGCCGC             |
| CTB1-R461A-3     | GCGGCGCTTCCGCCGACTCATGT              |
| CTB1-R461E-5     | ACATGAGTCCGGAAGAAGCGCCGC             |
| CTB1-R461E-3     | GCGGCGCTTCTTCCGACTCATGT              |
| CTB1-R658A-5     | GCCTCTATCACTGCGCCTCATGCCGGAG         |
| CTB1-R658A-3     | CTCCGGCATGAGGCGCAGTGATAGAGGC         |
| CTB1-R658E-5     | GCCTCTATCACTGAACCTCATGCCGGAG         |
| CTB1-R658E-3     | CTCCGGCATGAGGTTTCAAGTGATAGAGGC       |
| CTB1-R879A-5     | GAGTGCACCATGCGCACAGAGCCGTAGC         |
| CTB1-R879A-3     | GCTACGGCTCTGTGCGCATGGTGC ACTC        |
| CTB1-R879E-5     | GAGTGCACCATGAACACAGAGCCGTAGC         |
| CTB1-R879E-3     | GCTACGGCTCTGTGTTTCAAGTGACTC          |

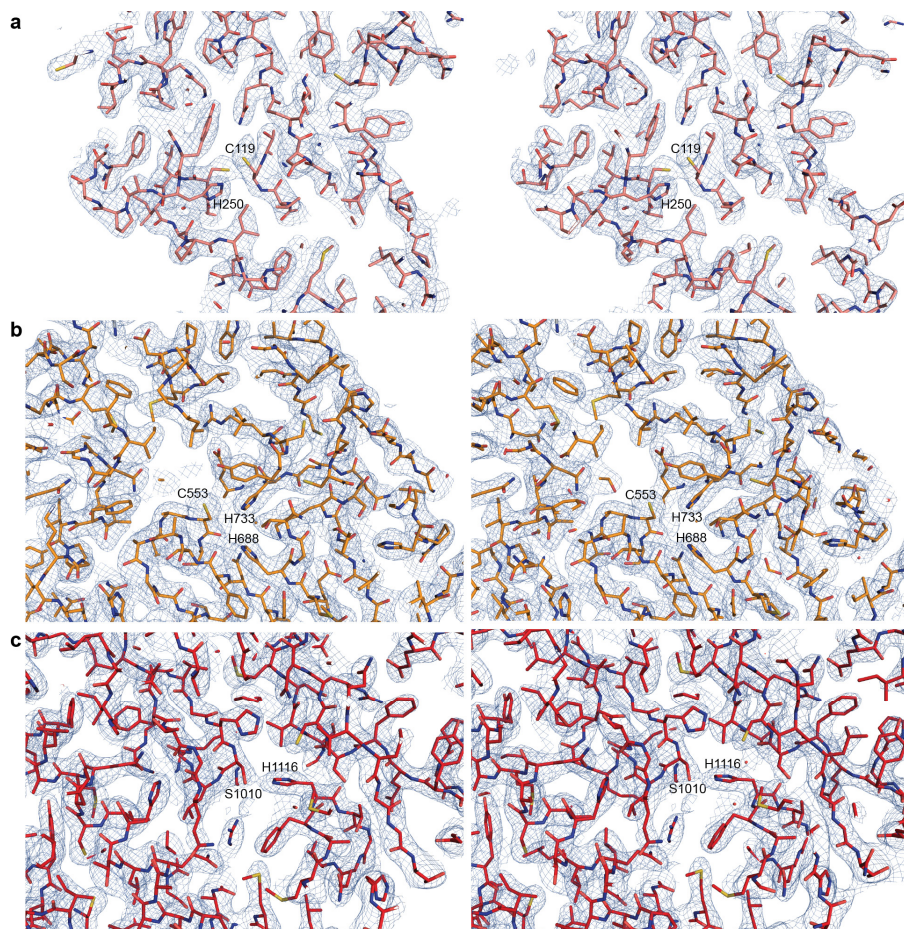

**Supplementary Figure 1 | Stereo electron density quality assessment maps.**  $2F_o - F_c$  electron density maps at  $1.0 \sigma$  of the SAT (a), KS (b), and MAT (c) active site regions are shown.

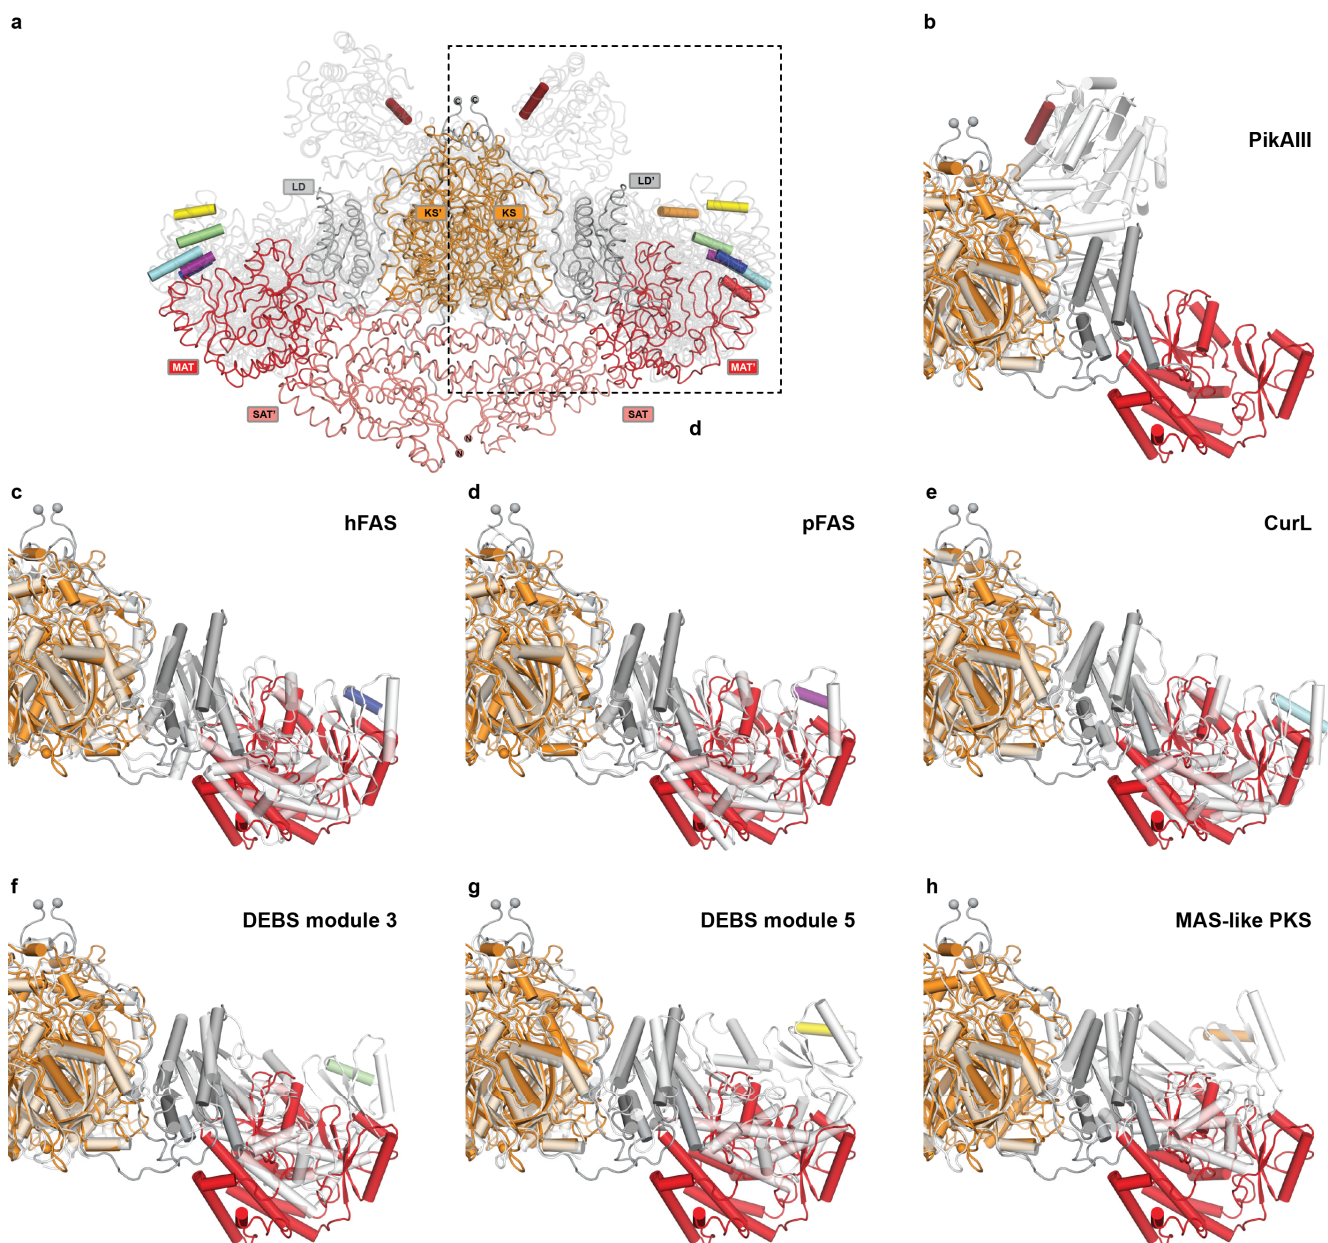

**Supplementary Figure 2 | Comparison of PKS and FAS condensensing region structures. (a)**

Overview of all superposed condensensing region structures on the CTB1 KS domain. Structural differences are visualized by hinge-bending motions of the (M)ATs as described by Herbst *et al.* 2016 (Nature 531, 533-537). Colored loop representation is shown for CTB1, all other structures are shown grey transparent. Equivalent cylindrical helix of the (M)AT domains are shown to indicate structural differences relative to CTB1 (light red) for PikAIII (dark red, **b**), human FAS

(hFAS, dark blue, PDB:3hhd, **c**), porcine FAS (pFAS, PDB:2vz9, violet, **d**), CurL (cyan, PDB:4mz0, **e**), DEBS module 3 (green, PDB:2qo3, **f**), DEBS module 5 (yellow, PDB:2hg4, **g**) and a MAS-like PKS (orange, PDB:5bp1, **h**). **(b-h)** Inset of (a) in cartoon representation showing the individual superpositions. The model corresponding to PikAIII (b) was fitted according to Dutta *et al.* 2014 (Nature 510, 512-517) (EMDB:5649).

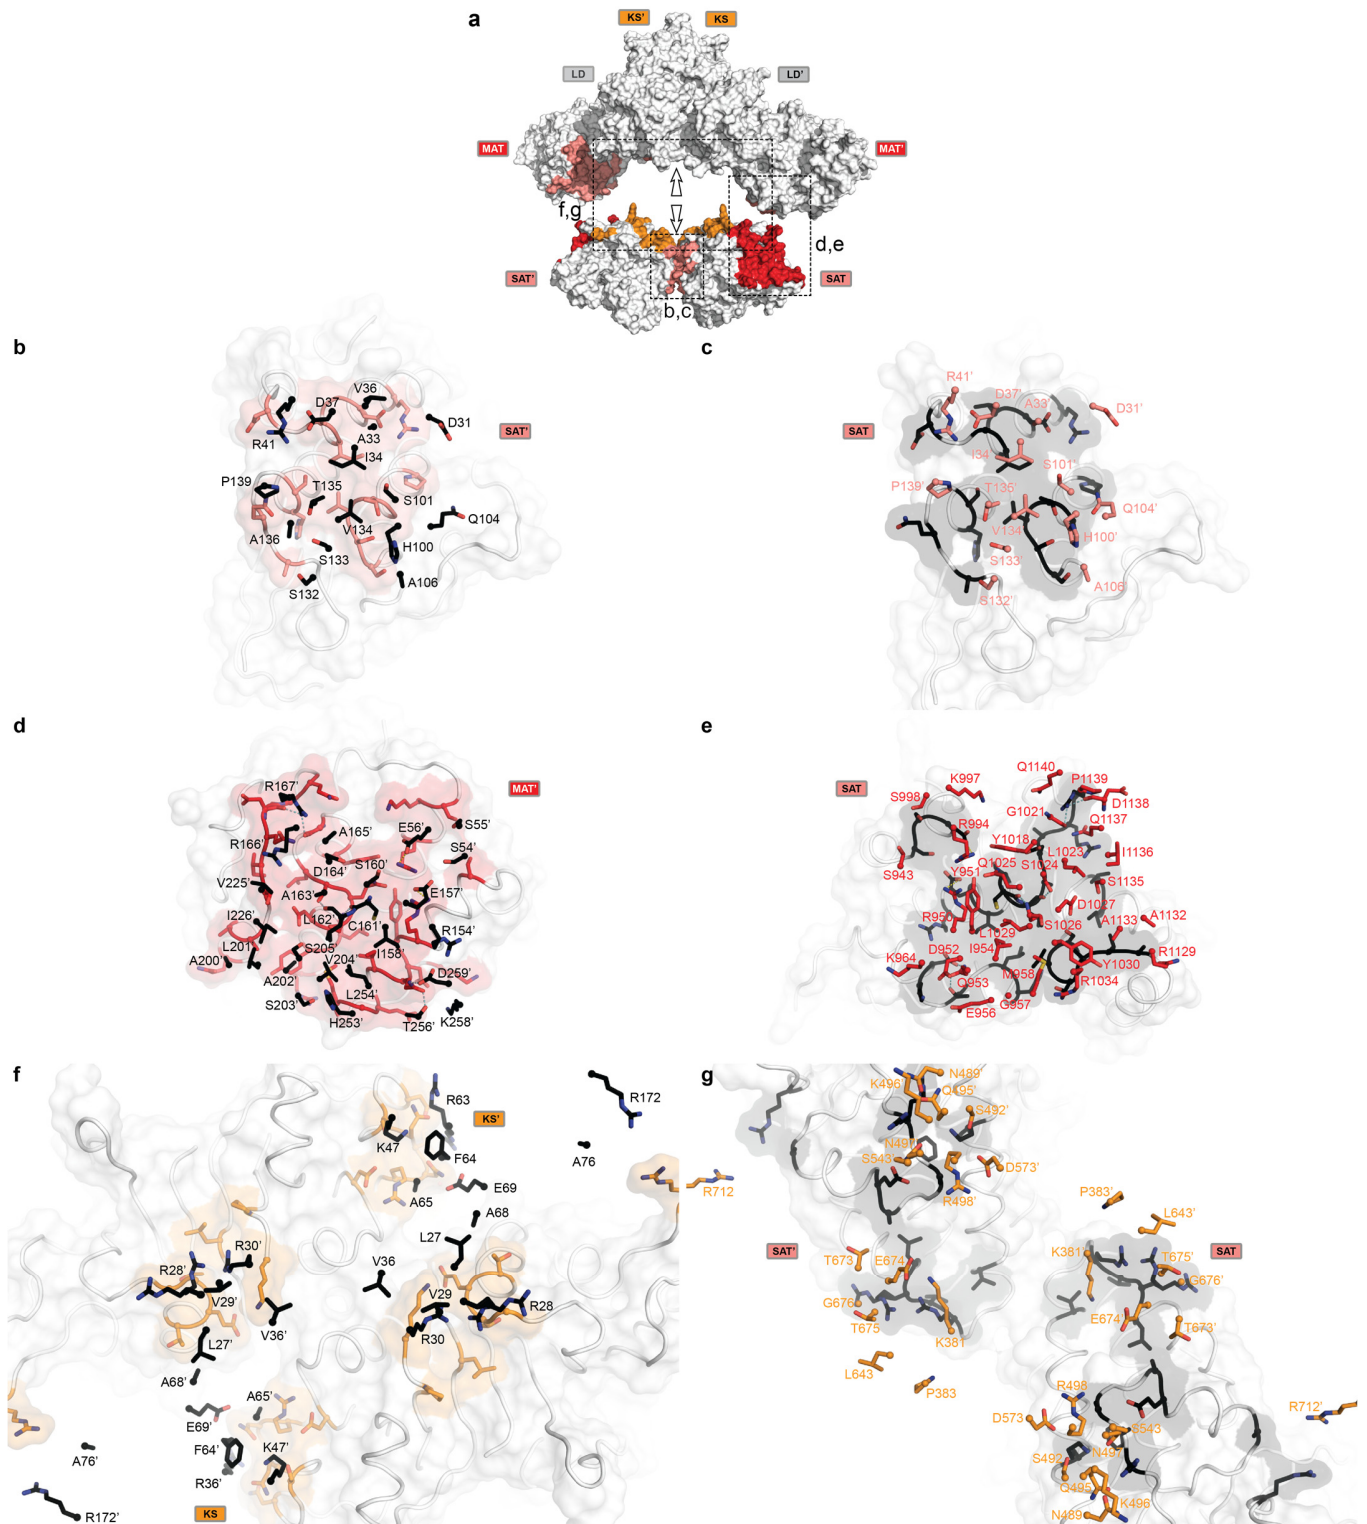

**Supplementary Figure 3 | SAT interfaces in the loading/condensing region of CTB1. (a)**

Overview of interfaces with insets showing the location of the SAT/SAT (b,c), SAT/MAT (d,e),



and SAT/KS (**f,g**) interfaces. All interfaces are shown in a top view. Transparent surfaces are colored according to interfacing residues of the domain in the back. All interfaces are shown from both sides corresponding to a 180° rotation between the left and right panel. Residue numbers correspond to interfacing residues in the front shown in the same color. C $\alpha$  positions are shown as spheres. Salt bridges (yellow) and hydrogen bonds (cyan) are indicated as dotted lines.

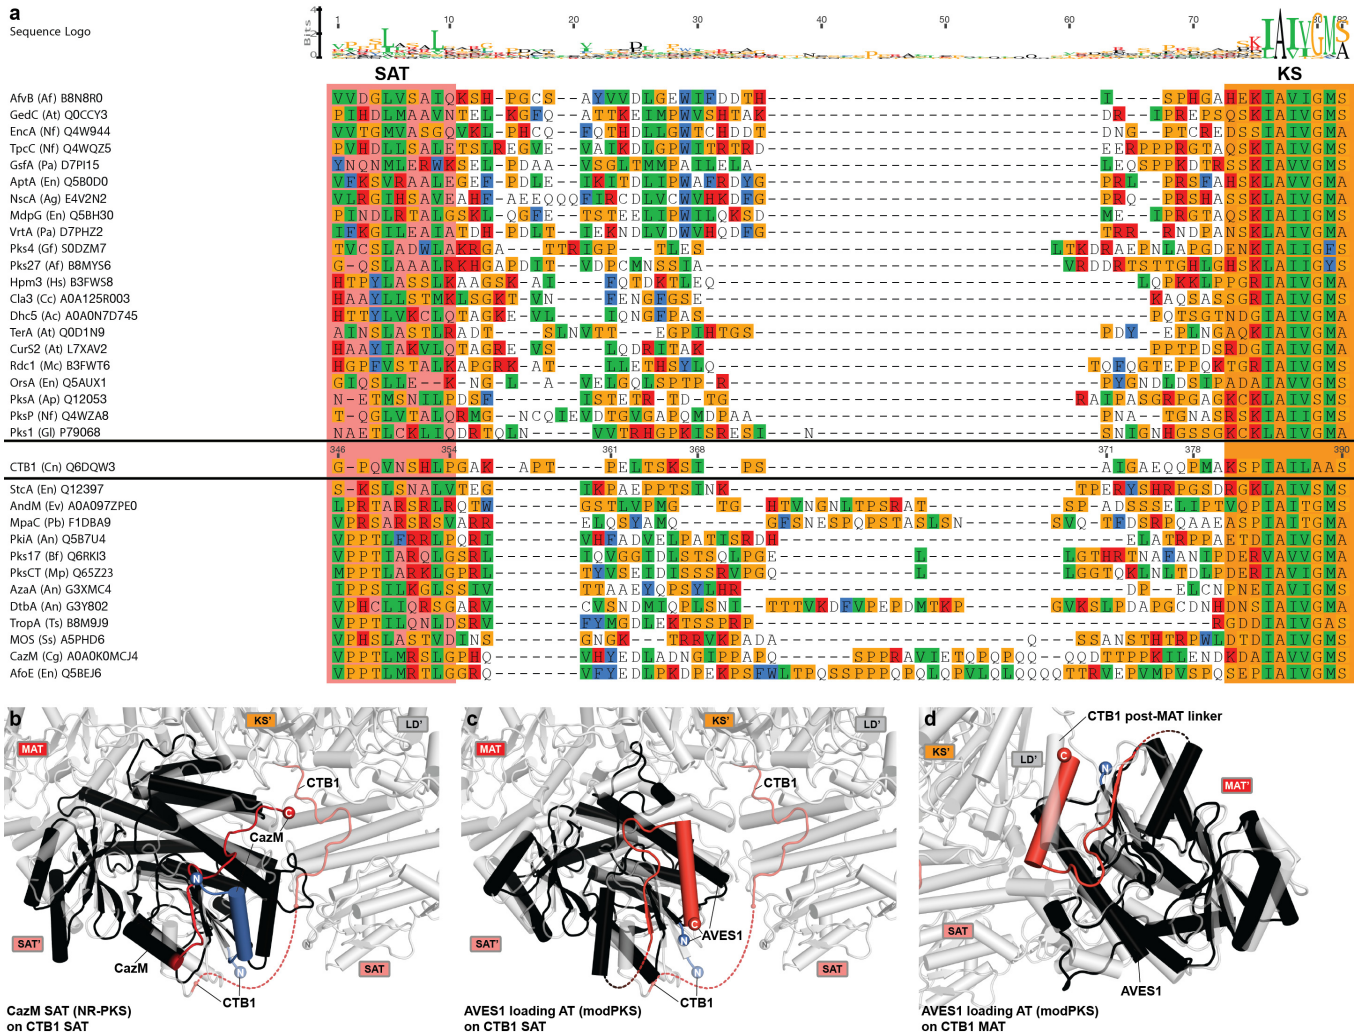

**Supplementary Figure 4 | Integration of loading domains in PKS. (a)**, Sequence alignment of 34 SAT-KS linker sequences of NR-PKS. All sequences are labelled as “protein name (organism abbreviation) Uniprot number”. **(b)** Superposition of the CazM SAT (black) onto the SAT domain of CTB1 SAT-KS-MAT (light grey) shows a similar location of the SAT C-terminal linker ending (dark red/light red for CazM/CTB1), which points towards the N-terminus of the KS in CTB1. **(c)** Superposition of the loading domain of the AVES1 avermectin modPKS (black) onto the SAT domain of CTB1 SAT-KS-MAT reveals differences in C-terminal linker organization. **(d)** Superposition of the AVES1 loading domain onto CTB1 MAT shows that the

AVES1 post-loading domain linker contains an  $\alpha$ -helix that matches the linker architecture of MAT in CTB1 (and AT domains in modPKS).

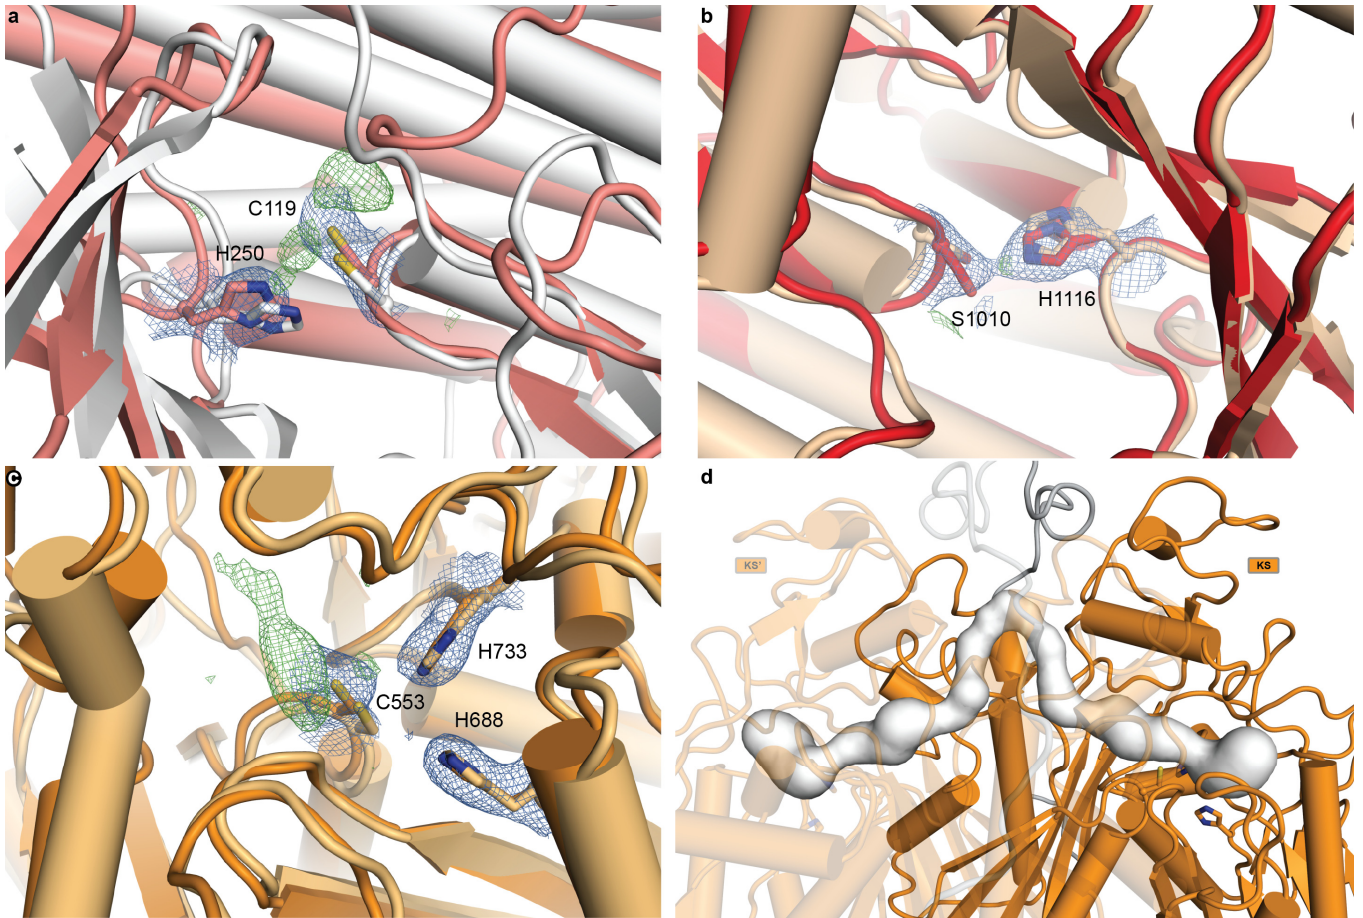

**Supplementary Figure 5 | The individual active sites of SAT, MAT and KS are structurally**

**conserved.** (a-c) Superpositions onto previously known structures (as listed in parenthesis) of the SAT (a, pink, with CazM SAT in white), MAT (b, red, with CurL AT in wheat), and KS (c, orange, with CurL KS in light orange) domains are shown in cartoon representation. Active site residues are shown in stick representation with residue numbers corresponding to CTB1.

Electron density maps for CTB1 active site residues are shown with a blue ( $2F_o-F_c$  at  $1.0 \sigma$ ) and green ( $F_o-F_c$  at  $3.0 \sigma$ ) mesh. Unidentified difference density around the active site residues C119 (SAT) and C553 (KS) indicated partial acylation or oxidation. (d) A narrow and hydrophobic active site tunnel (white) connects the KS active sites.

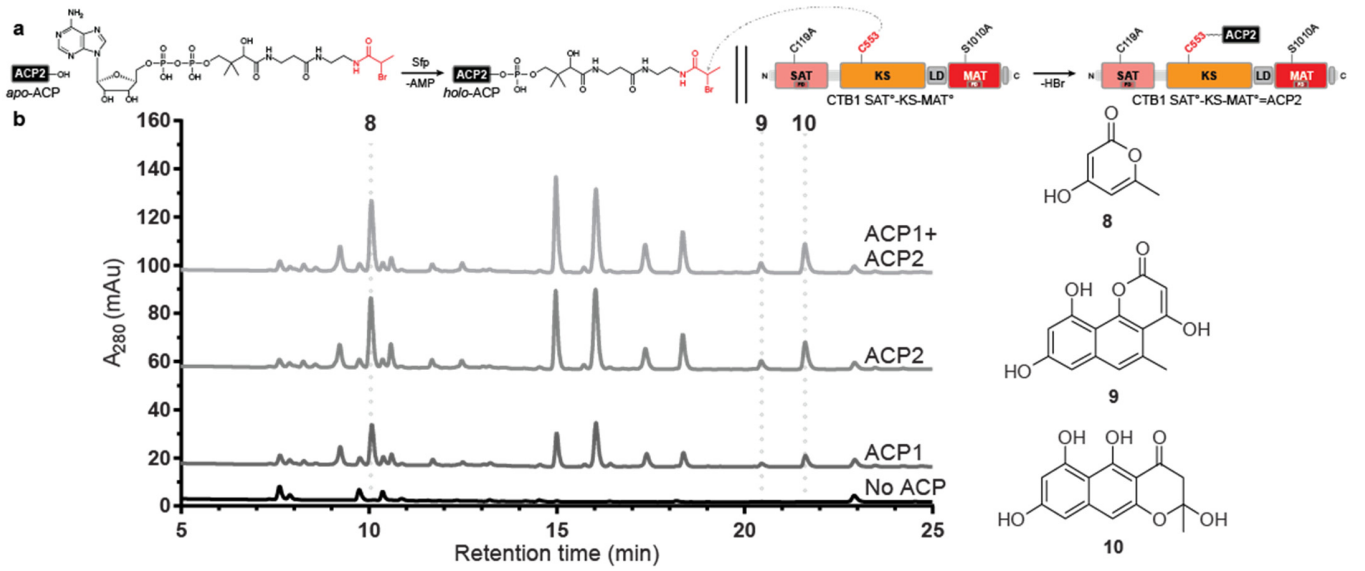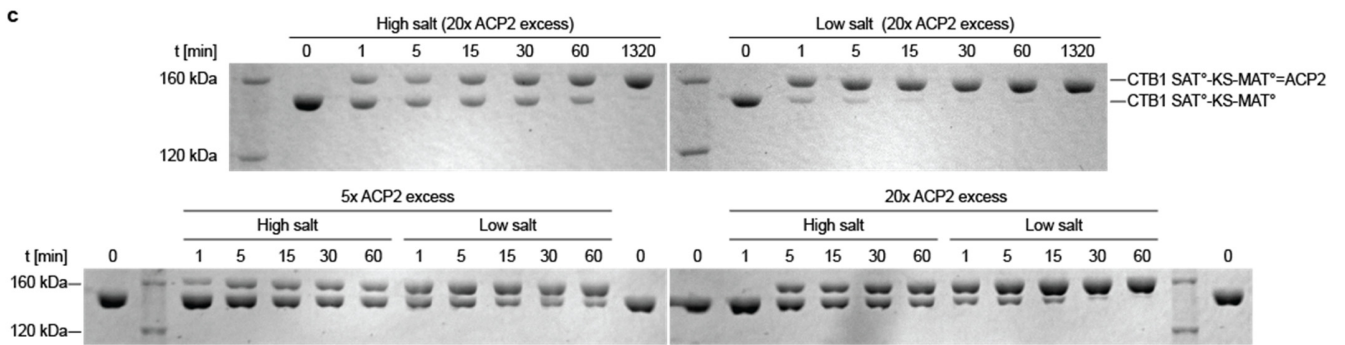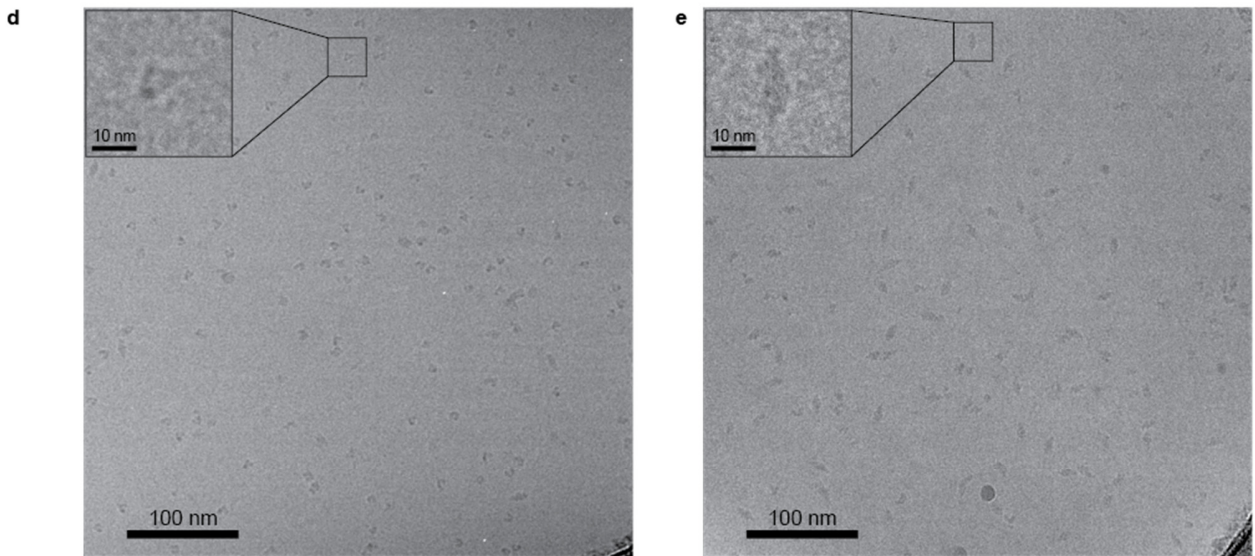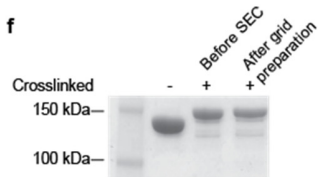

**Supplementary Figure 6 | ACP activity, crosslinking and cryo-EM sample preparation. (a)**

Scheme for ACP2 loading with a dephospho-amino-CoA analog (black), containing the  $\alpha$ -bromopropionyl crosslinker (red), and site specific crosslinking to the KS domain of CTB1 SAT<sup>o</sup>-KS-MAT<sup>o</sup>. **(b)** HPLC chromatograms (280 nm) of minimal *in vitro* CTB1 reconstitution reactions with SAT-KS-MAT and ACP1 (10  $\mu$ M), ACP2 (10  $\mu$ M), or both (5  $\mu$ M each). Curves are off-set for visualization. Previously characterized CTB1 derailment products **8**, **9**, and **10**, and negative controls lacking ACP are indicated. No increase in activity is observed when ACP1 and ACP2 are combined, suggesting they are biosynthetically equivalent and interchangeable. These experiments were repeated twice with similar results. **(c)** Denaturing SDS-PAGE analysis with Coomassie staining of crosslinking time course in high (50 mM Tris pH 7.5, 250 mM NaCl) and low (50 mM Tris pH 7.5) salt buffer as well as for two different CTB1 SAT<sup>o</sup>-KS-MAT<sup>o</sup>:ACP2 ratios. Crosslinking proceeds faster in low salt buffer and at higher excess of ACP2. Gels are cropped. These experiments were repeated more than three times from independent protein preparations with similar results. **(d,e)** Drift corrected and dose filtered cryo-EM micrographs reveal clearly recognizable shapes for monomeric (d) and dimeric (e) particles. More than 10 grids have been prepared independently from more than three protein preparations with similar results. **(f)** Denaturing SDS-PAGE analysis with Coomassie staining of the sample used for cryo-EM grid preparation and data collection before SEC and after grid preparation.

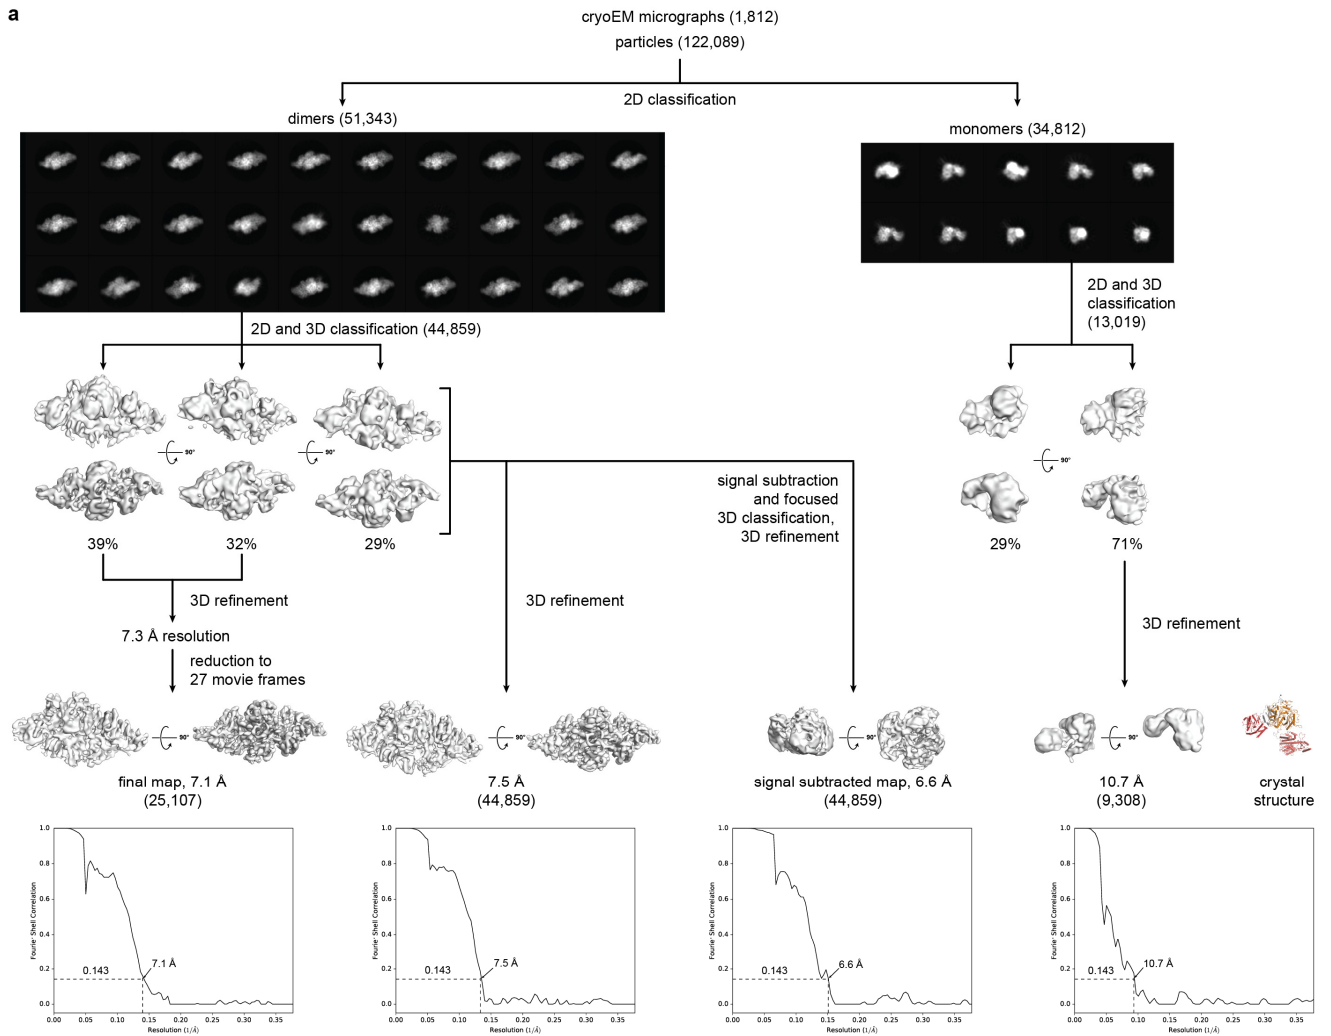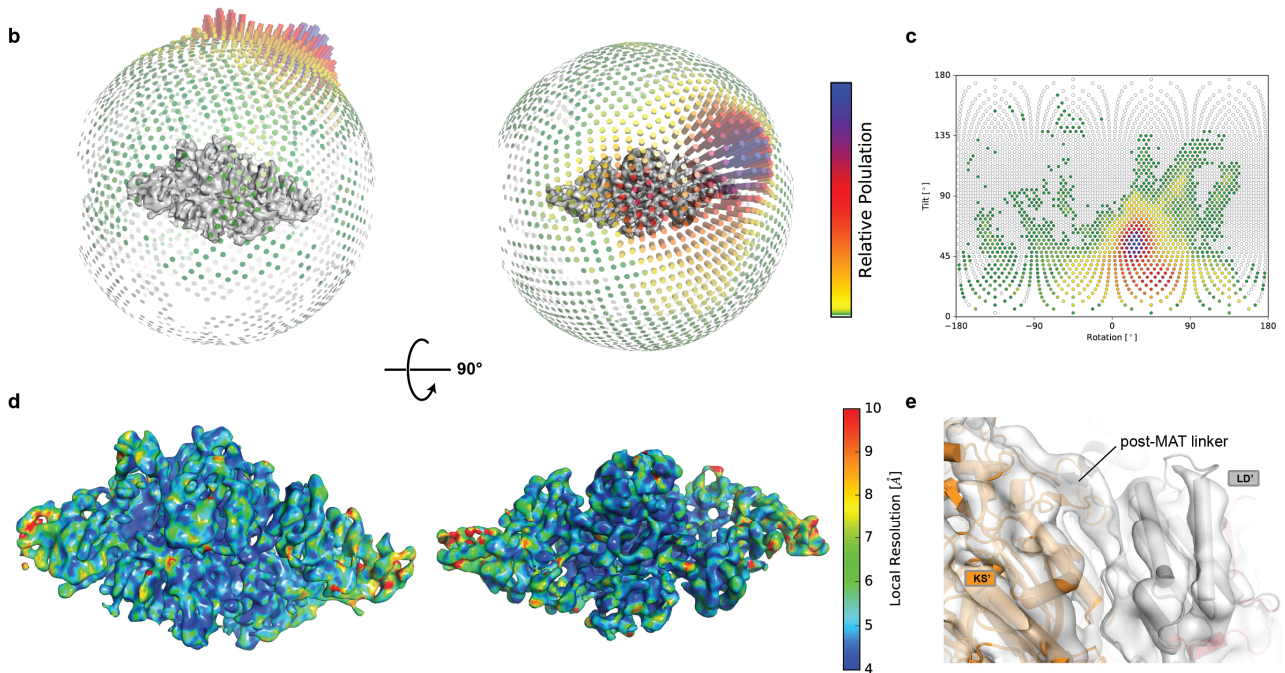

**Supplementary Figure 7 | Cryo-EM data processing scheme.** (a) 2D- and 3D-classification and sorting scheme for reconstructions of CTB1 SAT<sup>o</sup>-KS-MAT<sup>o</sup>=ACP2 dimers as well as monomers. 3D-class distributions are indicated below the models. FSC plots (corrected for effects of the mask) used for determining resolution based on the 0.143 criterion (Rosenthal, P. B. & Henderson, R. J. Mol. Biol. 333, 721-745 (2003)) is shown below the final models. A single data set has been collected from one pre-screened protein and grid preparation. (b, c) 3D (b) and 2D (c) angular distribution plot based on the alignment used for the final reconstruction. (d) Local resolution map of the final reconstruction at 7.1 Å resolution shows a resolution below 5 Å in the central KS region, decreasing towards the lateral MAT domains to around 10 Å. (e) The final map reveals features of secondary structure elements as well as linkers. All maps are contoured at 7.1σ.



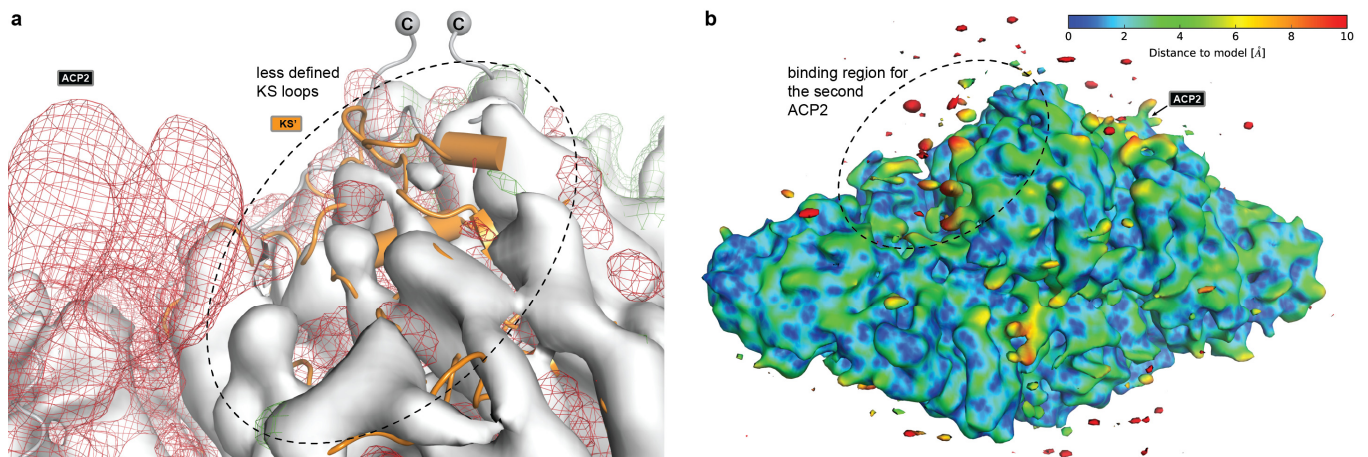

**Supplementary Figure 8 | Conformational variability in the cryo-EM structure of CTB1**

**SAT<sup>0</sup>-KS-MAT<sup>0</sup>=ACP2.** (a, b) KS-based C2 symmetry differences map of the final reconstruction at 7.1 Å resolution, contoured at 7.1σ (green: positive, red: negative). The potential ACP2 binding region on the KS surface is less ordered on the side lacking ACP2 density. (b) An unmasked map of the final reconstruction contoured at 3σ and colored by distance to the atomic model shows enhanced noise around the second ACP binding site.

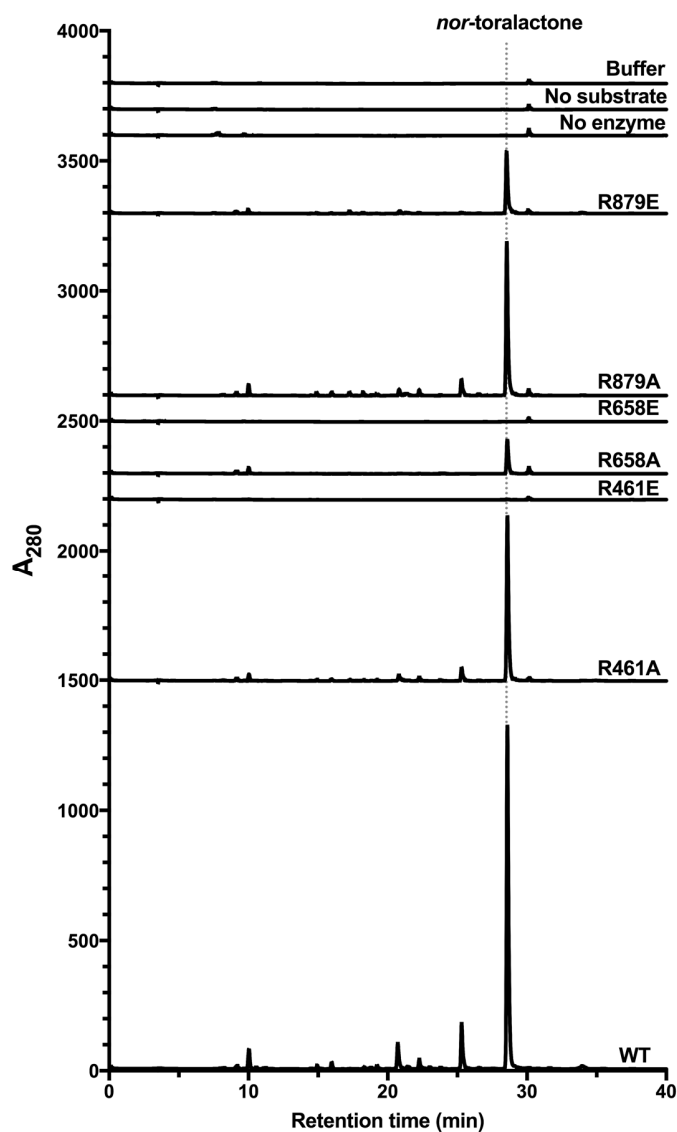

**Supplementary Figure 9 | CTB1 mutant activity in deconstruction experiments and ACP2 interface validation.** Representative HPLC chromatograms (280 nm) of full *in vitro* CTB1 reconstitution reactions (SAT-KS-MAT + ACP2 + PT + TE) with SAT-KS-MAT interface mutants are shown. Curves are off-set for visualization. *Nor-toralactone* production is indicated by a peak at a retention time of 28.6 min. These experiments were repeated three times with similar results.

a

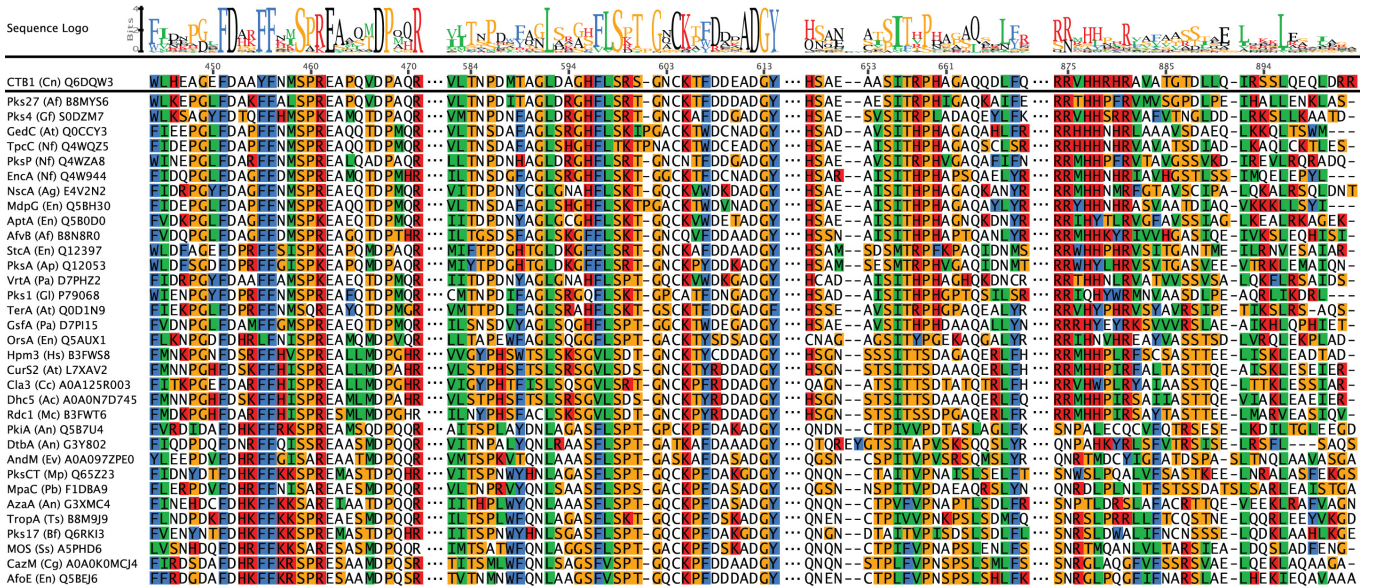

b

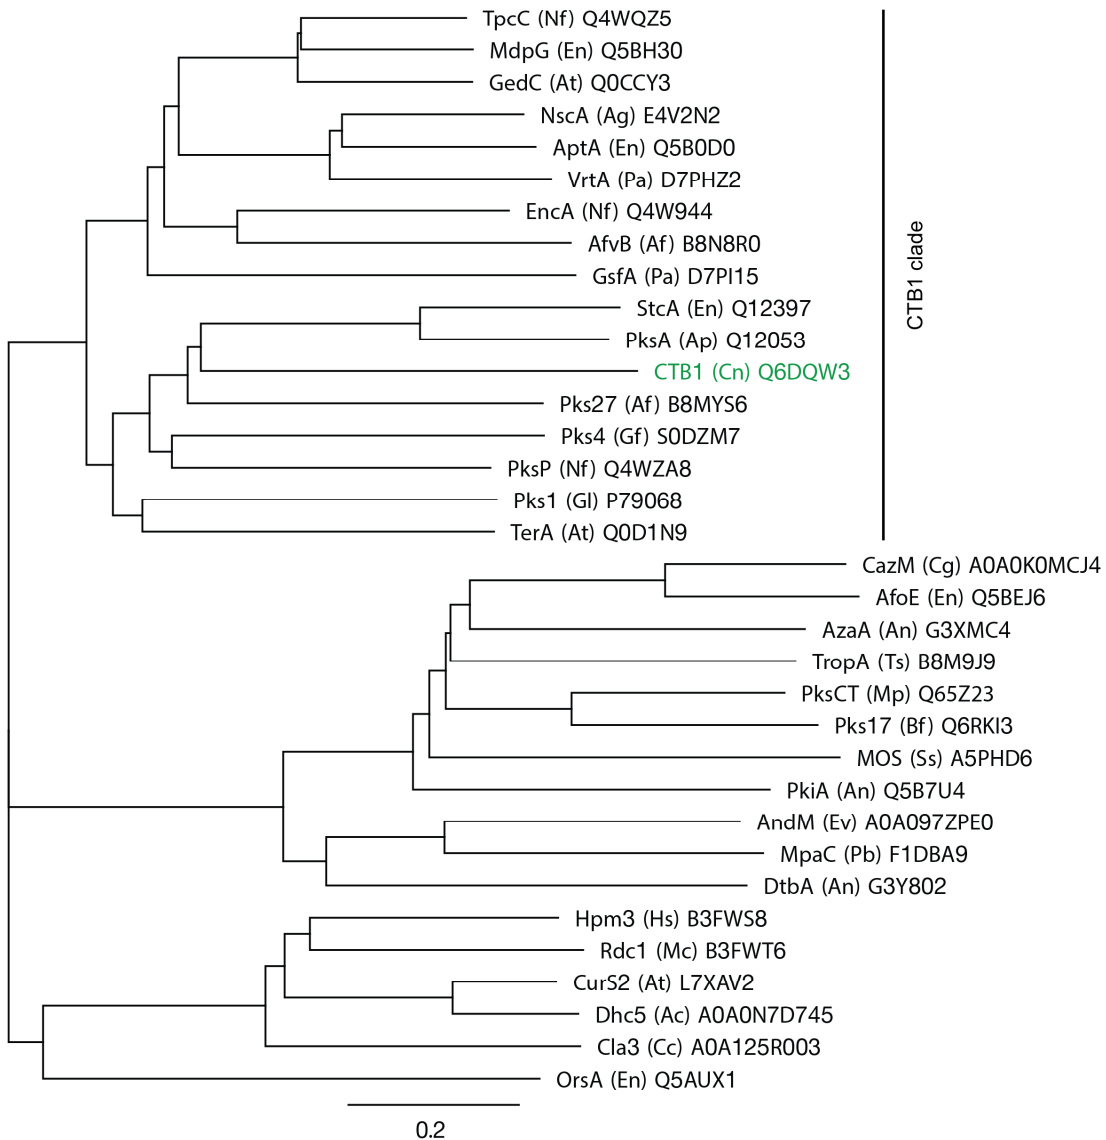

**Supplementary Figure 10 | CTB1 SAT-KS-MAT alignment of regions interfacing ACP2**

**and phylogeny.** All sequences are labelled as “protein name (organism abbreviation) Uniprot number”. **(a)** Sequence alignment of regions relevant for ACP2 interaction. \*, indicates interface mutants that reduce activity. **(b)** Phylogenetic analysis of NR-PKS indicates three main clades with one clustering around CTB1. Distance unit is given as accepted amino-acid substitutions per site and indicated by scale bar.

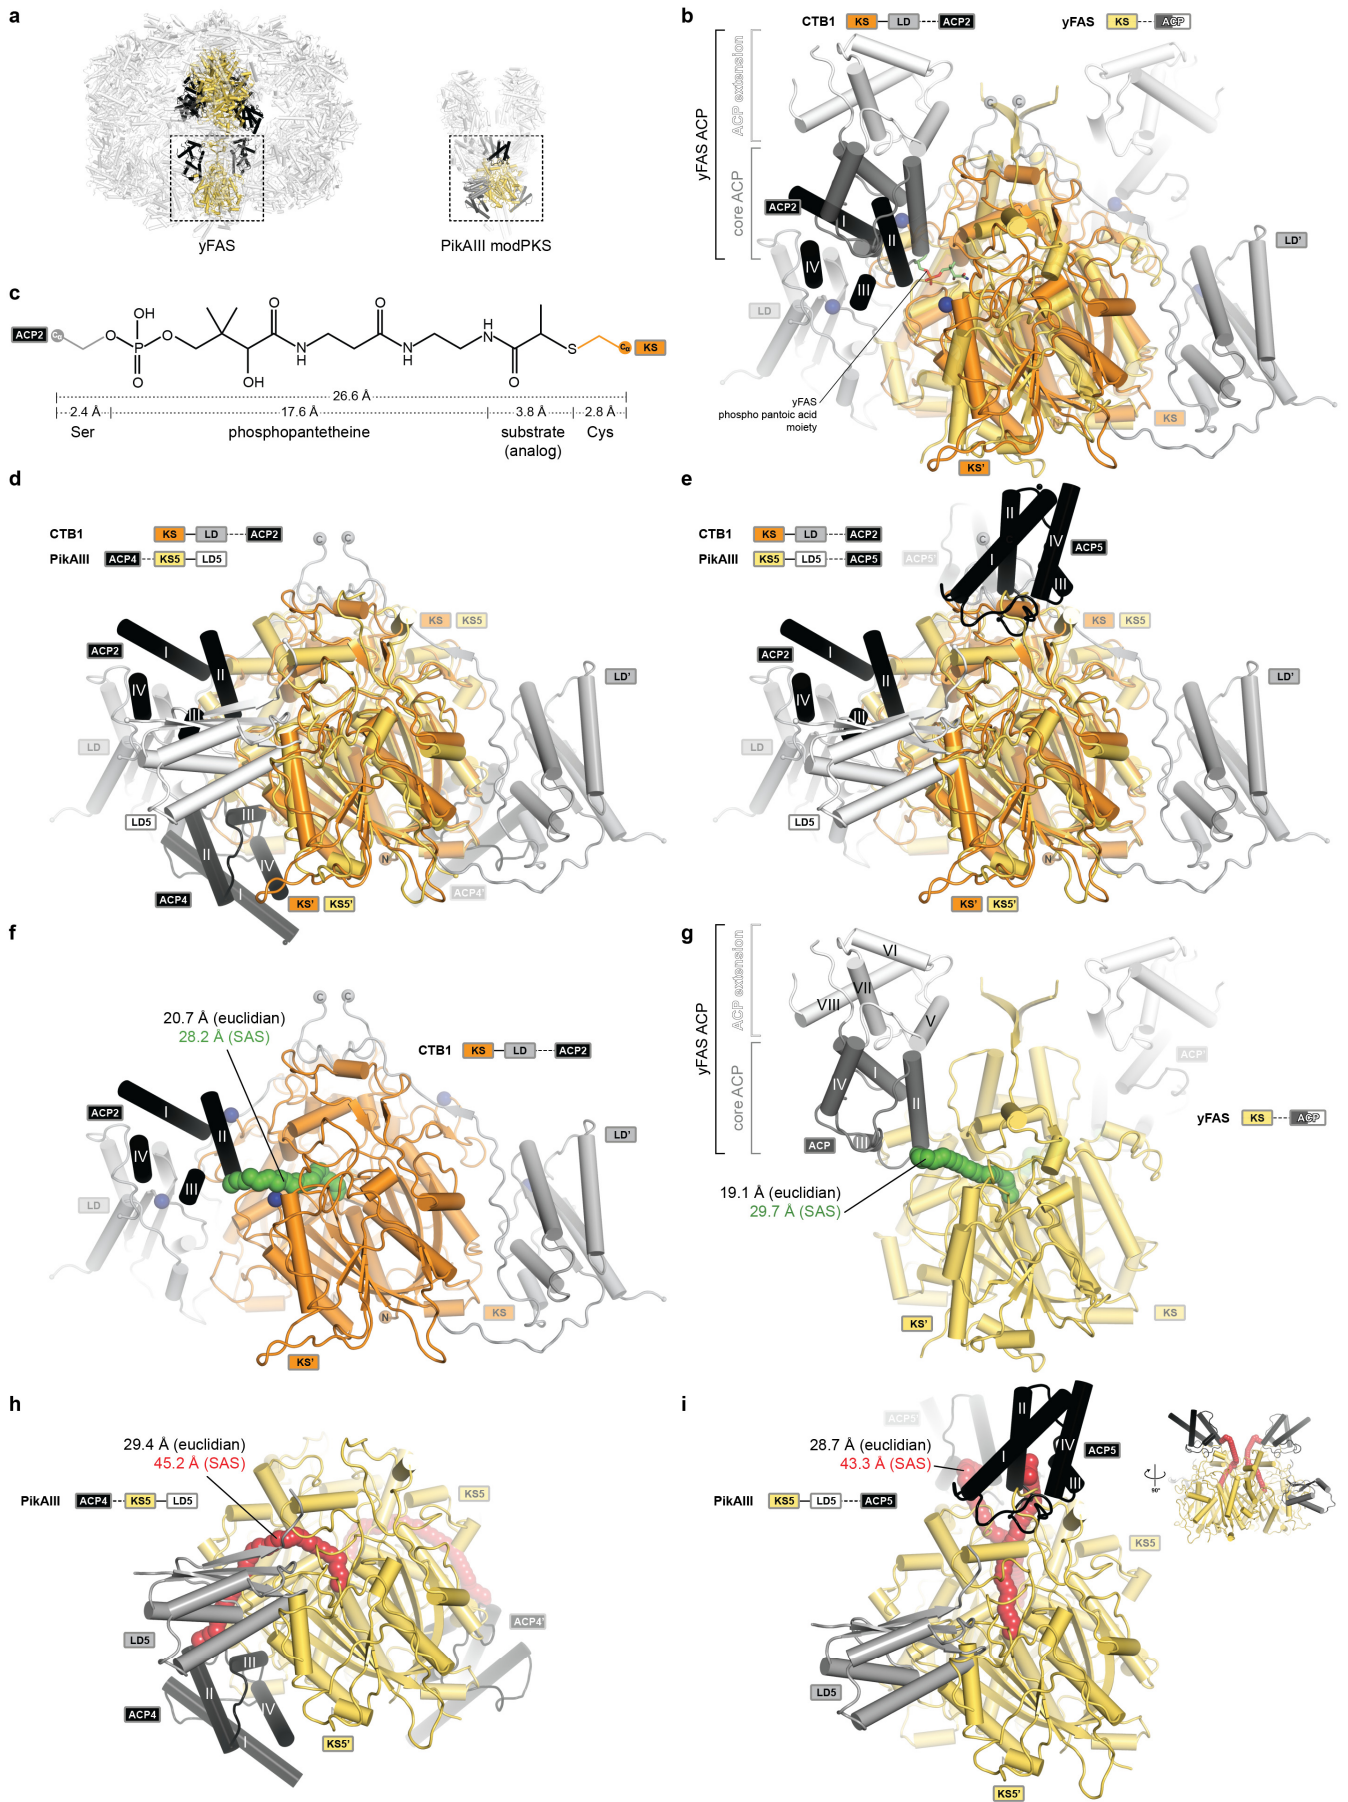

**Supplementary Figure 11 | Comparison of KS-ACP interactions in PKS and FAS. (a)** ACP interactions with multienzyme KS domains have been observed in the hetero-dodecameric yFAS and PikAIII modPKS. Superposition of the architecturally distinct yFAS-KS with CTB1 KS-LD<sup>o</sup>=ACP2. **(b)** The divergent ACP of yFAS consists of a C-terminal four-helix bundle extension (white) and the conserved four-helix bundle at the N-terminus, which interacts with the KS in a similar position as observed for ACP2 in CTB1. ACP-interfacing residues in CTB1 are indicated by blue spheres (see Fig. 3) **(c)** Derivation of the length of a fully extended crosslink between ACP2 and KS in CTB1. The defined length of the Ppant cofactor bridges a distance of approx. 27 Å between the ACP-Ser and the KS-Cys C<sub>α</sub> atoms for functional ACP interaction with active sites. **(d, e)** Superpositions of PikAIII with ACP4 (d) and ACP5 (e) on CTB1 KS-LD=ACP2 show the relative locations of the ACP binding interfaces. The LD5 arrangement in PikAIII is invers to CTB1. **(f-i)** C<sub>α</sub>-C<sub>α</sub> solvent accessible surface (SAS) distances between the ACP anchor and the KS active site cysteine in CTB1 (f), yFAS (g), and PikAIII with ACP4 (h) and ACP5 (i) are indicated. Solvent accessible surface paths are indicated by tubes of spheres and colored according to the agreement (green) or disagreement (red) with the length of the Ppant cofactor. The path for ACP5 to KS5 in PikAIII (i) is only accessible in the absence of the post-(M)AT linker, which was not resolved in the cryo-EM structure. An additional miniaturized-sideview is indicated. Corresponding euclidian distances are given in the panels. Domain colors are indicated in the panels; only KS, LD, and ACP domains are shown (b-i).

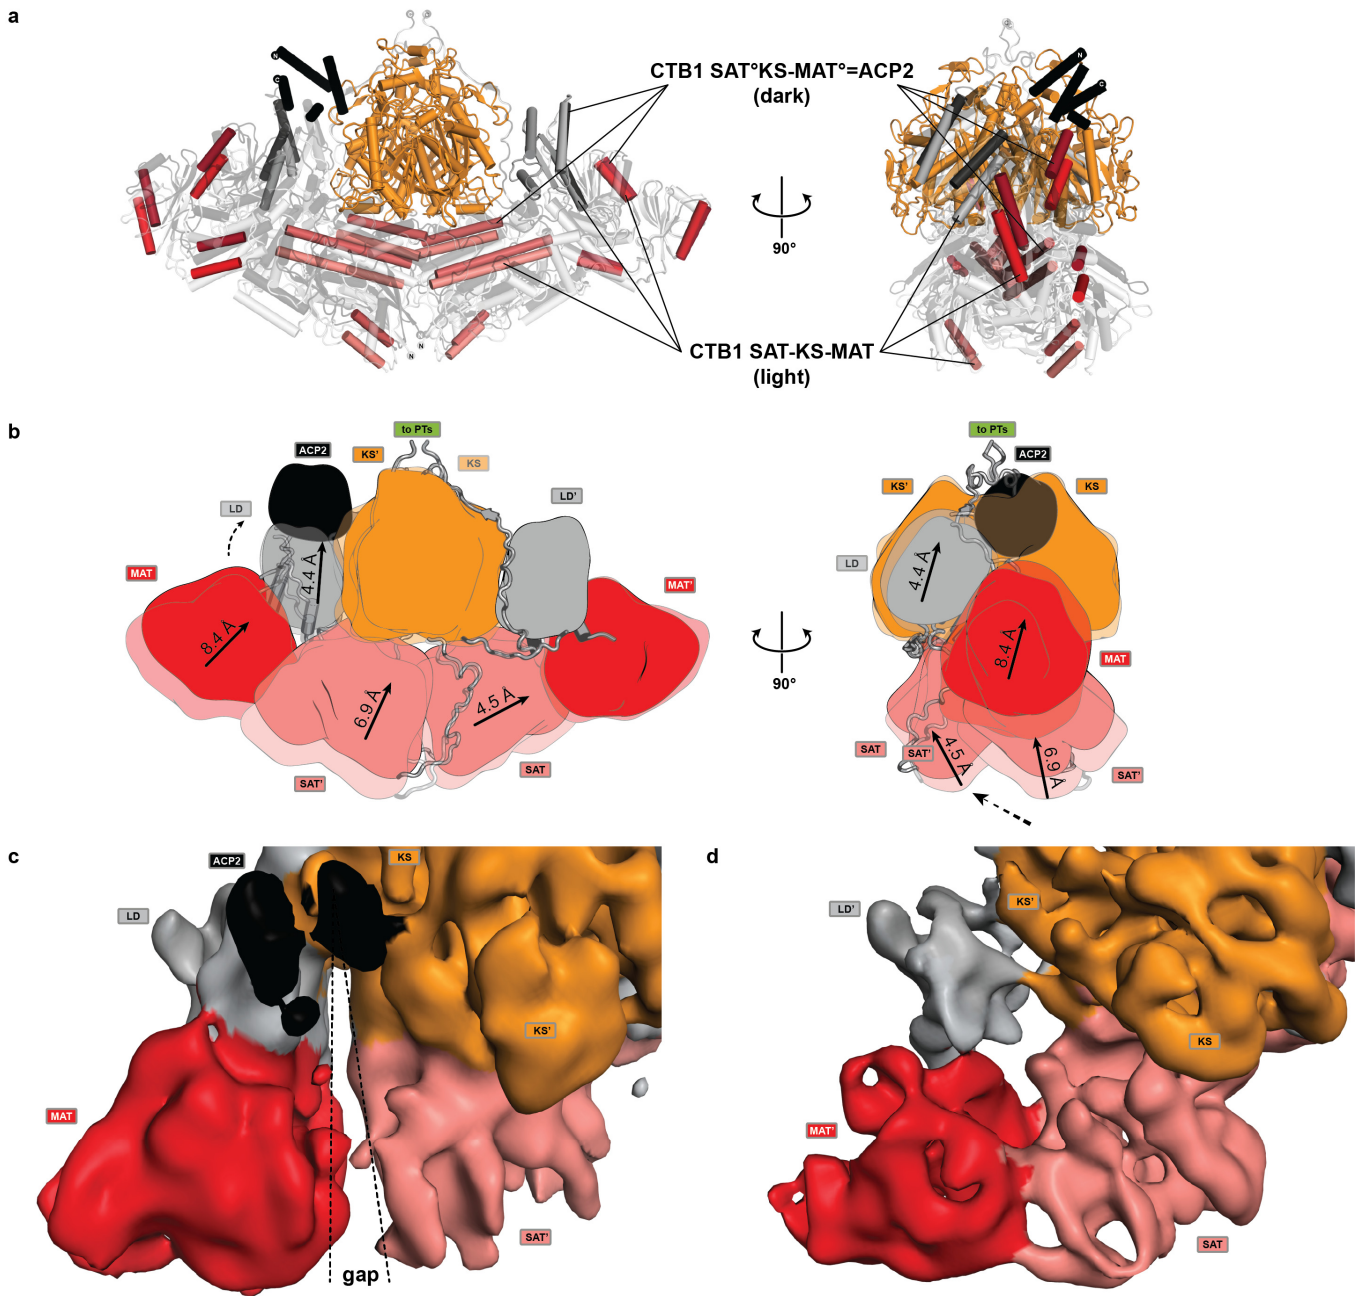

**Supplementary Figure 12 | Structural comparison between CTB1 SAT-KS-MAT and SAT<sup>°</sup>-KS-MAT<sup>°</sup>=ACP2. (a)** Superposition on the central KS dimer. Transparent cartoon representation of CTB1 is shown in white (SAT-KS-MAT) and black (SAT<sup>°</sup>-KS-MAT<sup>°</sup>=ACP2). Selected helices are shown in light (SAT-KS-MAT) and dark (SAT<sup>°</sup>-KS-MAT<sup>°</sup>=ACP2) domain

colors. **(b)** Schematic representation of relative domain motions. Distances are derived by domain-wise  $C_{\alpha}$ -r.m.s.d. calculations. **(c, d)** Structural differences at the MAT-SAT interface in the cryo-EM reconstruction are shown for the unsharpened map. While the side with visualized ACP2 **(c)** reveals a gap, the side with unresolved ACP2 shows a connected interface **(d)**.



**Supplementary Movie 1 | ACP2 binding to the CTB1 loading/condensing region.** Structures of the CTB1 loading/condensing region with and without crosslinked ACP2 are morphed. In the ACP2-bound structure, ACP is visualized at a single binding-site in an overall structure with increased asymmetry. ACP2 is located in a cleft between the KS dimer and one LD. Around ACP2, LD and MAT are moved upwards, and the interface between the neighboring MAT and SAT domains is loosened. The SAT is translocated towards the KS and the second SAT is pushed against the KS and MAT in the opposite half of the dimer.
